# Supplementary material for: Solvent/UV driven information encryption based on a multilayer quasi-amorphous photonic heterostructure
Source: Royal Society of Chemistry journal article supplement (doi:10.1039/d1tc04386b), 2021-01-01
Supplement: d1tc04386b12.pdf [file d1tc04386b12.pdf]

## Supporting information

### **Solvent/UV driven Information Encryption Based on Multilayer Quasi-amorphous Photonic Heterostructure**

Xiaoxiang Wen, Xuegang Lu\*, Jianing Li, Chaoping Wei and Sen Yang\*

School of Physics, MOE Key Laboratory for Nonequilibrium Synthesis and Modulation of Condensed Matter, Xi'an Jiaotong University, Xi'an 710049, People's Republic of China

\* Address correspondence to: [xglu@mail.xjtu.edu.cn](mailto:xglu@mail.xjtu.edu.cn); [yangsen@mail.xjtu.edu.cn](mailto:yangsen@mail.xjtu.edu.cn)

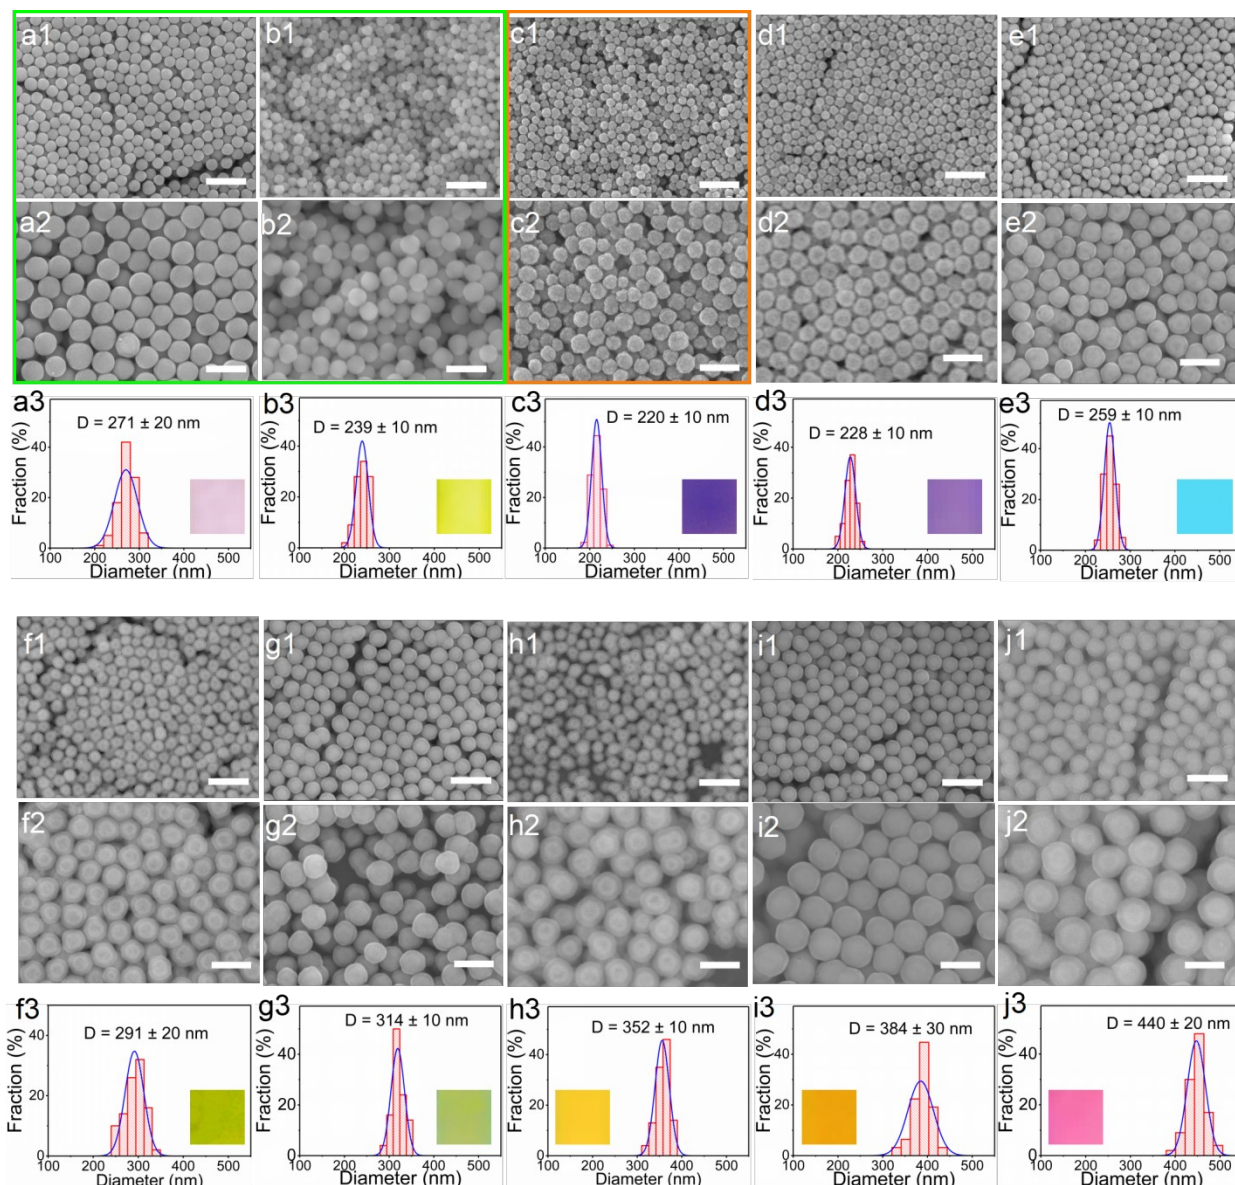

**Figure S1.** (a1-j1, a2-j2, a3-j3) Low-magnification, high-magnification SEM images and particle size distribution of  $\text{SiO}_2$  (a-b),  $\text{Fe}_3\text{O}_4$  (c) and  $\text{Fe}_3\text{O}_4@ \text{SiO}_2$  (d-j) particles, respectively. The inserts in a3-j3 indicate the structural colors of the corresponding coatings. The scale bars in (a1-j1) and (a2-j2) are 1  $\mu\text{m}$  and 500 nm, respectively.

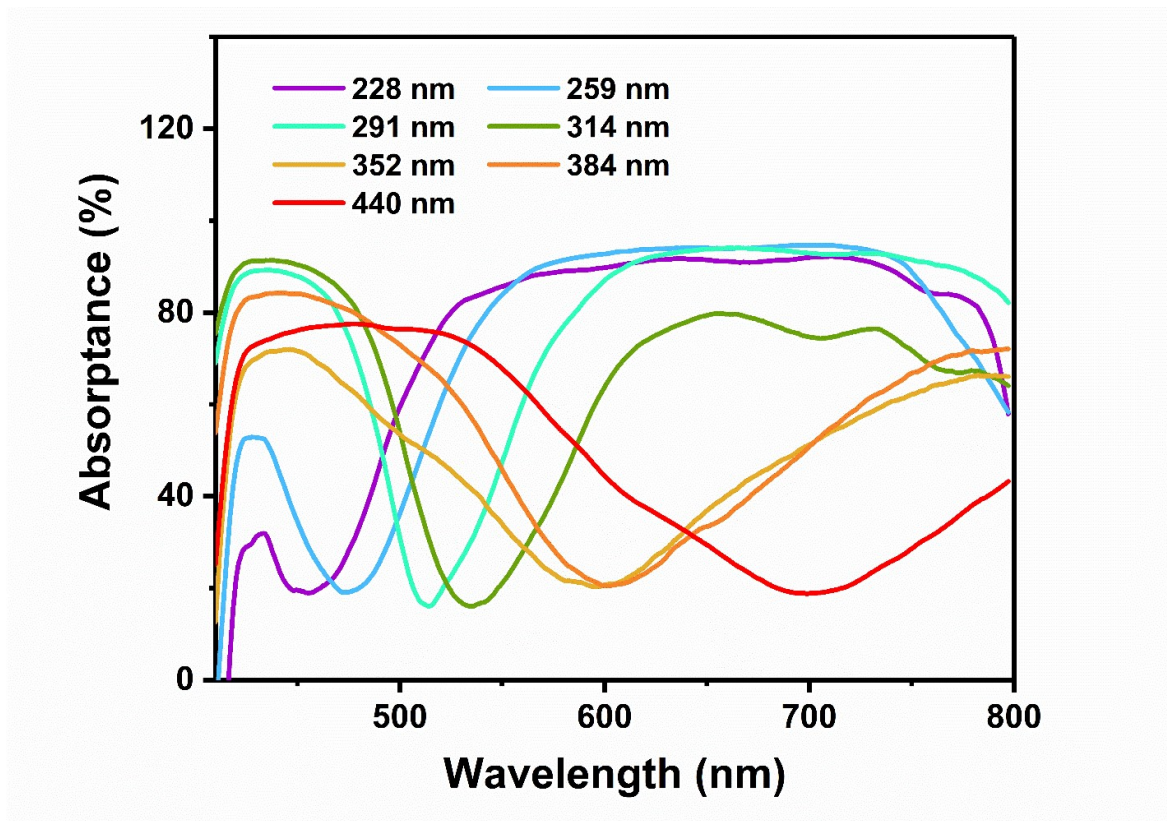

Figure S2. Absorption spectra of Fe<sub>3</sub>O<sub>4</sub>@SiO<sub>2</sub> QAPS heterostructure with different particle sizes.

## Refractive index of Fe<sub>3</sub>O<sub>4</sub>@SiO<sub>2</sub> particles

The effective refractive index of Fe<sub>3</sub>O<sub>4</sub>@SiO<sub>2</sub> can be calculated by the following equation:

$$n_{eff} = n_{Fe_3O_4}(r/R)^3 + n_{SiO_2}[1-(r/R)^3]$$

Where  $n_{Fe_3O_4}$  and  $n_{SiO_2}$  are the refractive index of Fe<sub>3</sub>O<sub>4</sub> and SiO<sub>2</sub>,  $r$  and  $R$  represent the radii of Fe<sub>3</sub>O<sub>4</sub> cores and Fe<sub>3</sub>O<sub>4</sub>@SiO<sub>2</sub> core@shell particles, respectively. Here, the radii of Fe<sub>3</sub>O<sub>4</sub> core is 220 nm. According to this formula, the effective refractive index of Fe<sub>3</sub>O<sub>4</sub>@SiO<sub>2</sub> with particle sizes of 228 nm, 259 nm, 291 nm, 314 nm, 352 nm, 384 nm, and 440 nm are 2.32, 2.11, 1.87, 1.78, 1.68, 1.63, and 1.58, respectively. Although the effective refractive index of Fe<sub>3</sub>O<sub>4</sub>@SiO<sub>2</sub> particles becomes smaller as the SiO<sub>2</sub> coating layer becomes thicker, the Fe<sub>3</sub>O<sub>4</sub>@SiO<sub>2</sub> QAPS coating still exhibits bright structural color due to the absorption of stray light by black Fe<sub>3</sub>O<sub>4</sub>.

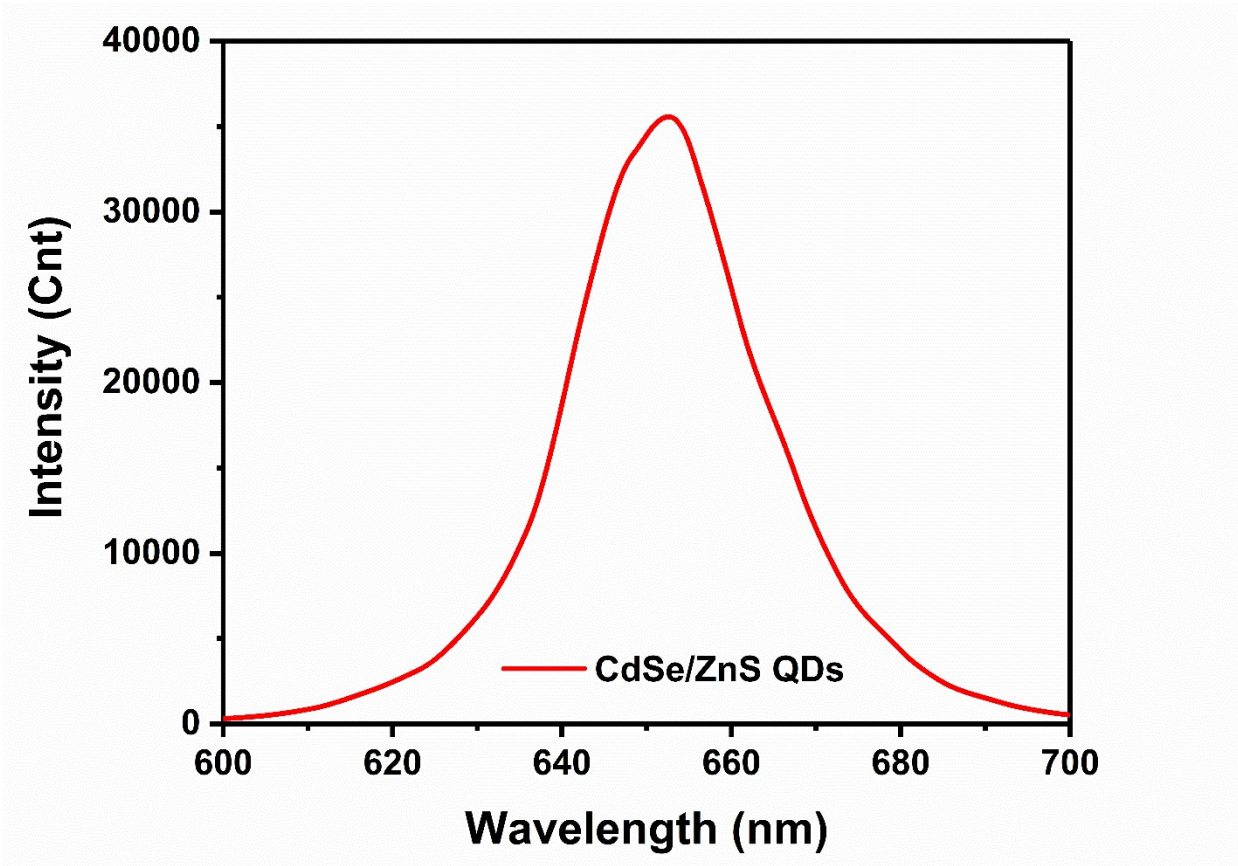

**Figure S3.** The photoluminescence spectra of CdSe/ZnS QDs.

### Resolution of encrypted patterns

The boundary resolution is determined by the distance between the substrate and the mask, and reducing the distance helps to obtain a high-resolution pattern.<sup>1</sup> By measuring the blur distance of the edges of the pattern prepared with the mask tightly contacted with substrate, the resolution of the encrypted patterns is estimated to about 120  $\mu\text{m}$ , as shown in Figure S4.

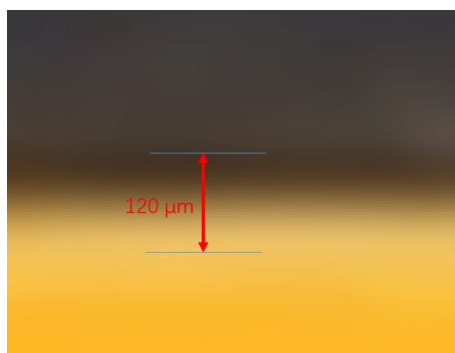

**Figure S4.** Resolution of the pattern.

### Notes and references

- 1 Y. Hu, D. Yang and S. Huang, *ACS Omega*, 2019, **4**, 18771-18779.
